# Supplementary material for: CD133+ cancer stem-like cells promote migration and invasion of salivary adenoid cystic carcinoma by inducing vasculogenic mimicry formation
Source: PubMed Central journal article supplement (PMC5045377; doi:10.18632/oncotarget.8665), 2016-04-09
Supplement: oncotarget-07-29051-s001.pdf [file oncotarget-07-29051-s001.pdf]

## CD133<sup>+</sup> cancer stem-like cells promote migration and invasion of salivary adenoid cystic carcinoma by inducing vasculogenic mimicry formation

### Supplementary Materials

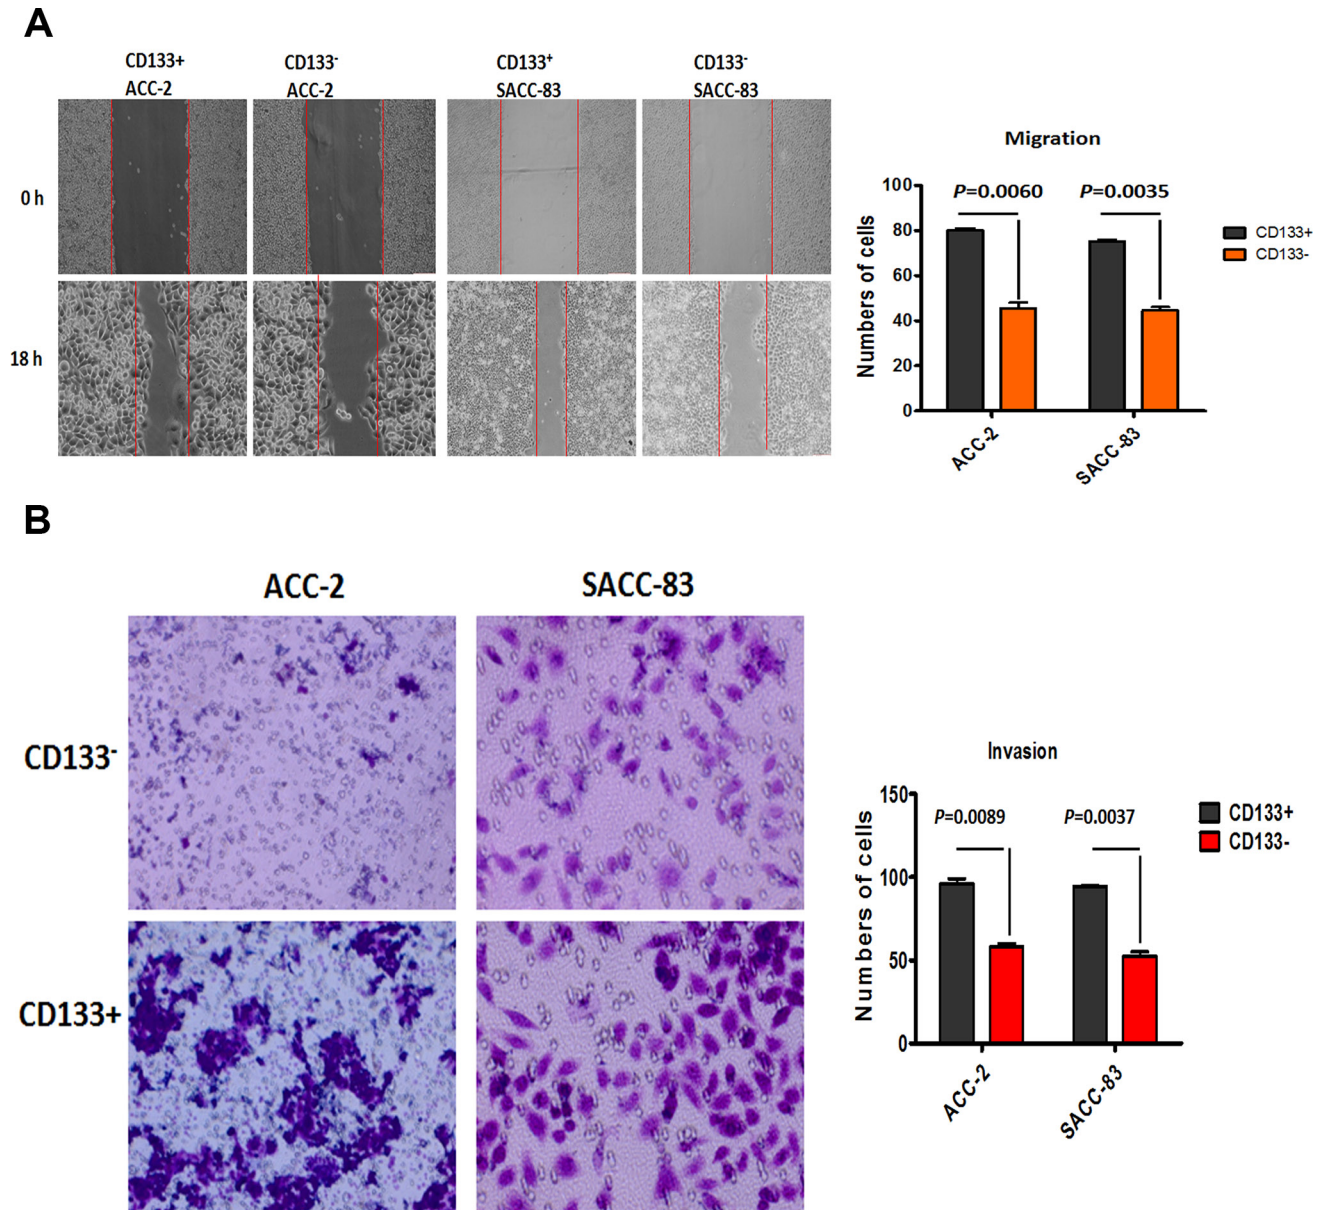

**Supplementary Figure S1: CD133<sup>+</sup> cancer stem-like cells promoted ACC migration and invasion.** (A and B) The quantitative analysis of migration (A) and invasion (B) in CD133<sup>+</sup> ACC-2 or SACC-83 and CD133<sup>-</sup> ACC-2 or SACC-83 cells. Representative images of migrated and invaded cells were shown under inverted microscopy. The mean was derived from cell counts of 5 fields, and each experiment was repeated 3 times. Approximate 95% CD133<sup>+</sup> ACC-2 or SACC-83 cells crossed the membrane and about 50% CD133<sup>-</sup> ACC-2 or SACC-83 cells crossed the membrane in the Transwell experiment. Scale bar = 50  $\mu$ m.

**Supplementary Table S1: Univariable survival analysis of clinical and pathological data of 45 adenoid cystic carcinoma of salivary gland**

| Clinicopathological features                            | <i>n</i> | 10 years Survival, % | <i>P</i> Value |
|---------------------------------------------------------|----------|----------------------|----------------|
| <b>Age</b>                                              |          |                      | 0.079          |
| <= 45                                                   | 18       | 35.2                 |                |
| > 45                                                    | 27       | 29.5                 |                |
| <b>Gender</b>                                           |          |                      | 0.094          |
| Female                                                  | 25       | 36.8                 |                |
| Male                                                    | 20       | 29.5                 |                |
| <b>Site</b>                                             |          |                      | 0.002          |
| Major salivary gland                                    | 29       | 38.2                 |                |
| Minor salivary gland                                    | 16       | 15.8                 |                |
| <b>T classification</b>                                 |          |                      | 0.061          |
| T1/T2                                                   | 30       | 31.4                 |                |
| T3/T4                                                   | 15       | 28.9                 |                |
| <b>Histological subtype</b>                             |          |                      | < 0.001        |
| Tubular/Cribiform                                       | 32       | 42.9                 |                |
| Solid                                                   | 13       | 3.0                  |                |
| <b>Local regional recurrence and distant metastasis</b> |          |                      | < 0.001        |
| Yes                                                     | 10       | 17.2                 |                |
| No                                                      | 35       | 39.5                 |                |
| <b>CD133 expression</b>                                 |          |                      | 0.002          |
| Positive                                                | 21       | 19.5                 |                |
| Negative                                                | 24       | 40.2                 |                |
| <b>VM expression</b>                                    |          |                      | 0.006          |
| Positive                                                | 18       | 23.3                 |                |
| Negative                                                | 27       | 38.2                 |                |

**Supplementary Table S2: Independent significant prognostic factors after cox multivariate survival analysis of adenoid cystic carcinomas of salivary gland**

| Variable                                   | Categories | Relative risk (95% confidence interval) | <i>p</i> -Value |
|--------------------------------------------|------------|-----------------------------------------|-----------------|
| Regional recurrence and Distant metastasis | present    | 2.2 (1.4–4.4)                           | < 0.05          |
| CD133 expression                           | positive   | 3.1 (2.0–5.1)                           | < 0.05          |
| VM expression                              | positive   |                                         | > 0.05          |
